# Supplementary material
Source: PubMed Central journal article supplement (PMC7422111)
Supplement: advancesADV2020001880-suppl1.pdf [file advancesADV2020001880-suppl1.pdf]

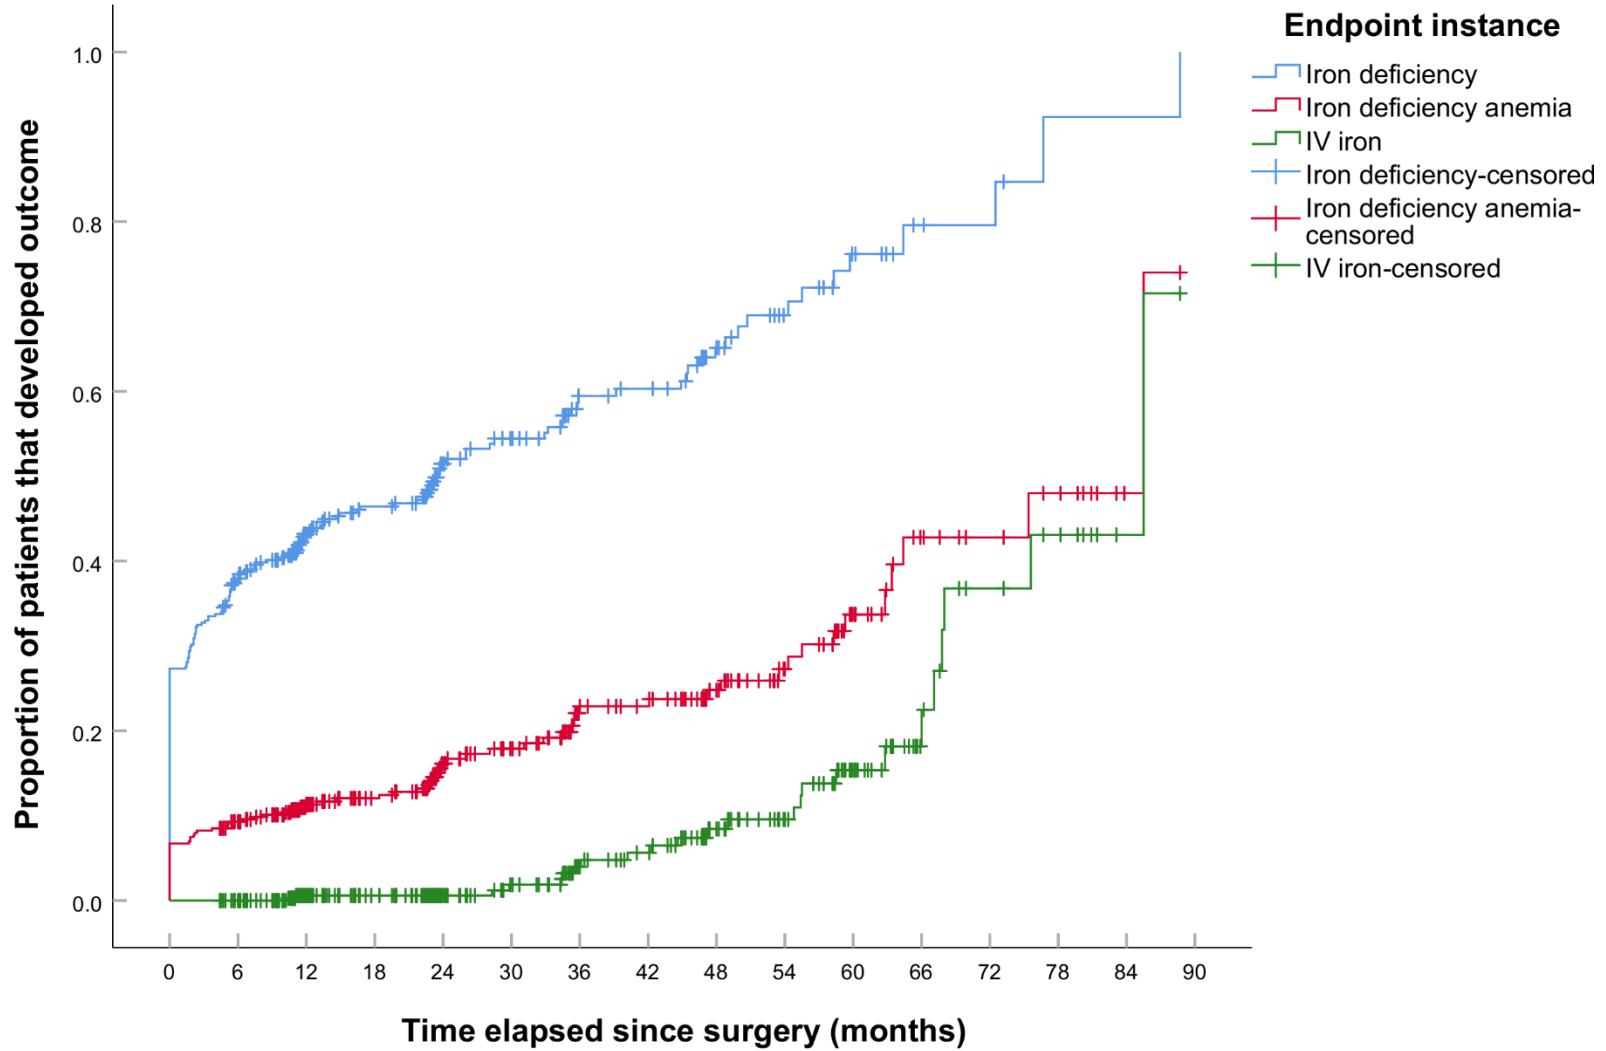

**Supplemental Figure 1. Kaplan-Meier curve of outcomes using a ferritin threshold of 40 ng/mL to define iron deficiency.** Proportion of patients that developed iron deficiency or iron deficiency anemia, or required IV iron, plotted against time since bariatric surgery.

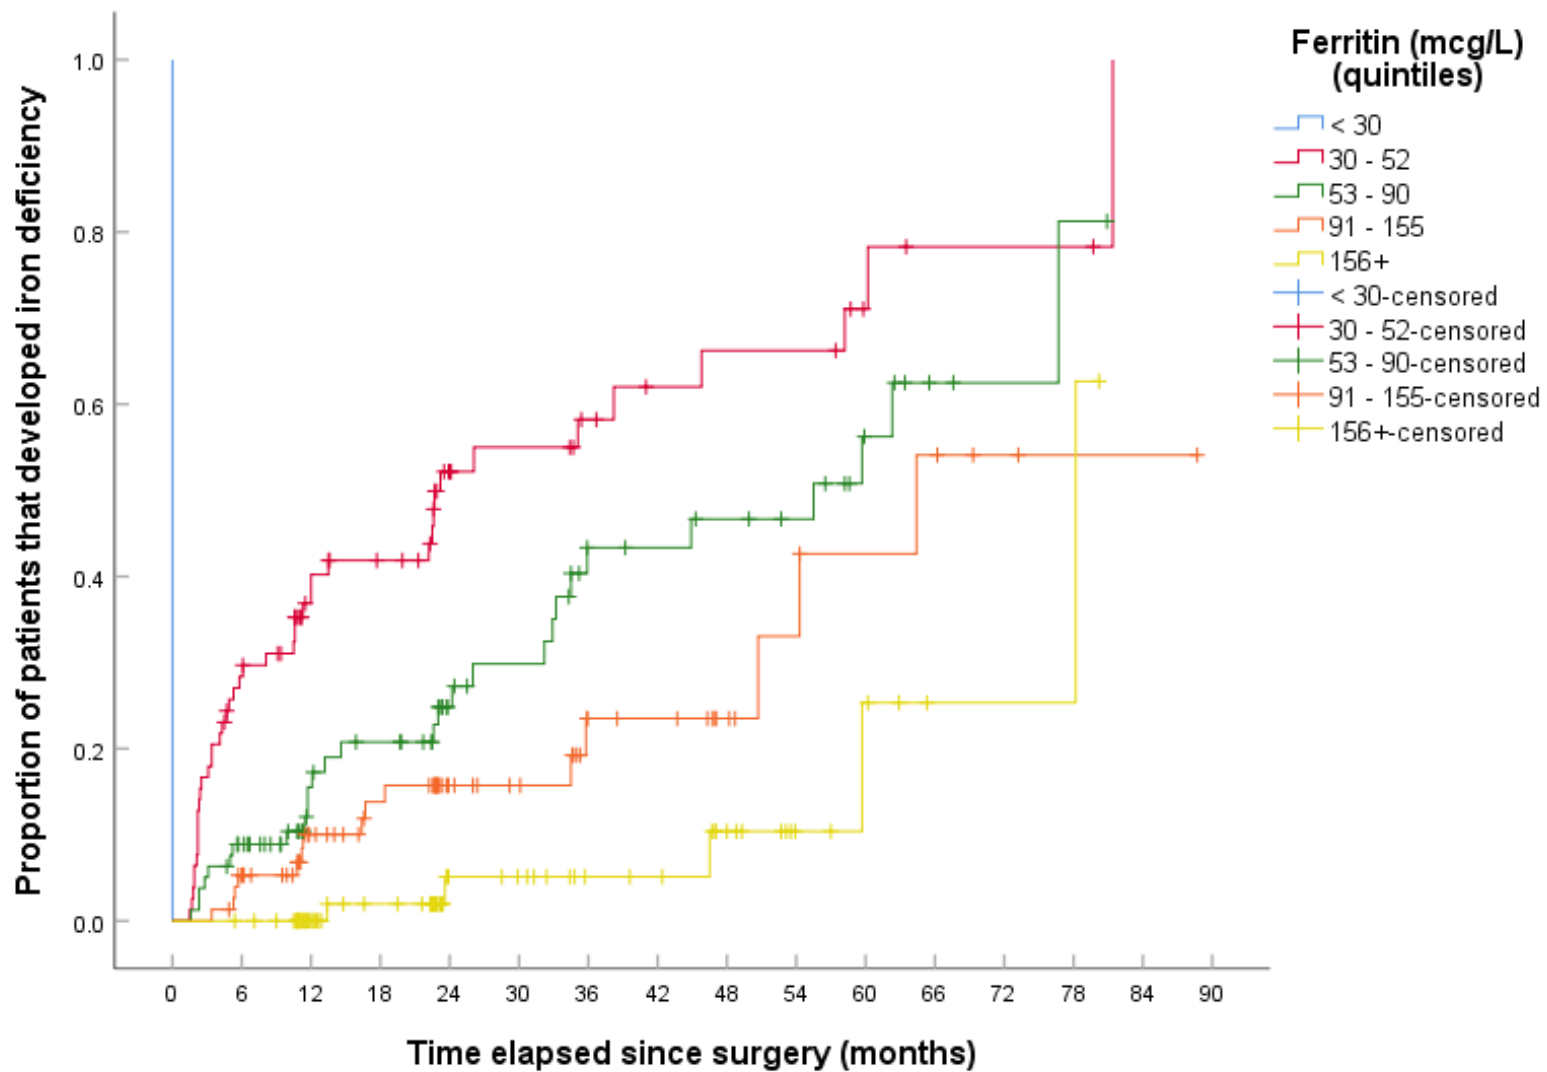

**Supplemental Figure 2. Kaplan-Meier curve of the diagnosis of iron deficiency, stratified by ferritin.** Proportion of patients that developed iron deficiency for each quintile of baseline ferritin level. The difference between groups was statistically significant ( $p$ -value < 0.001).

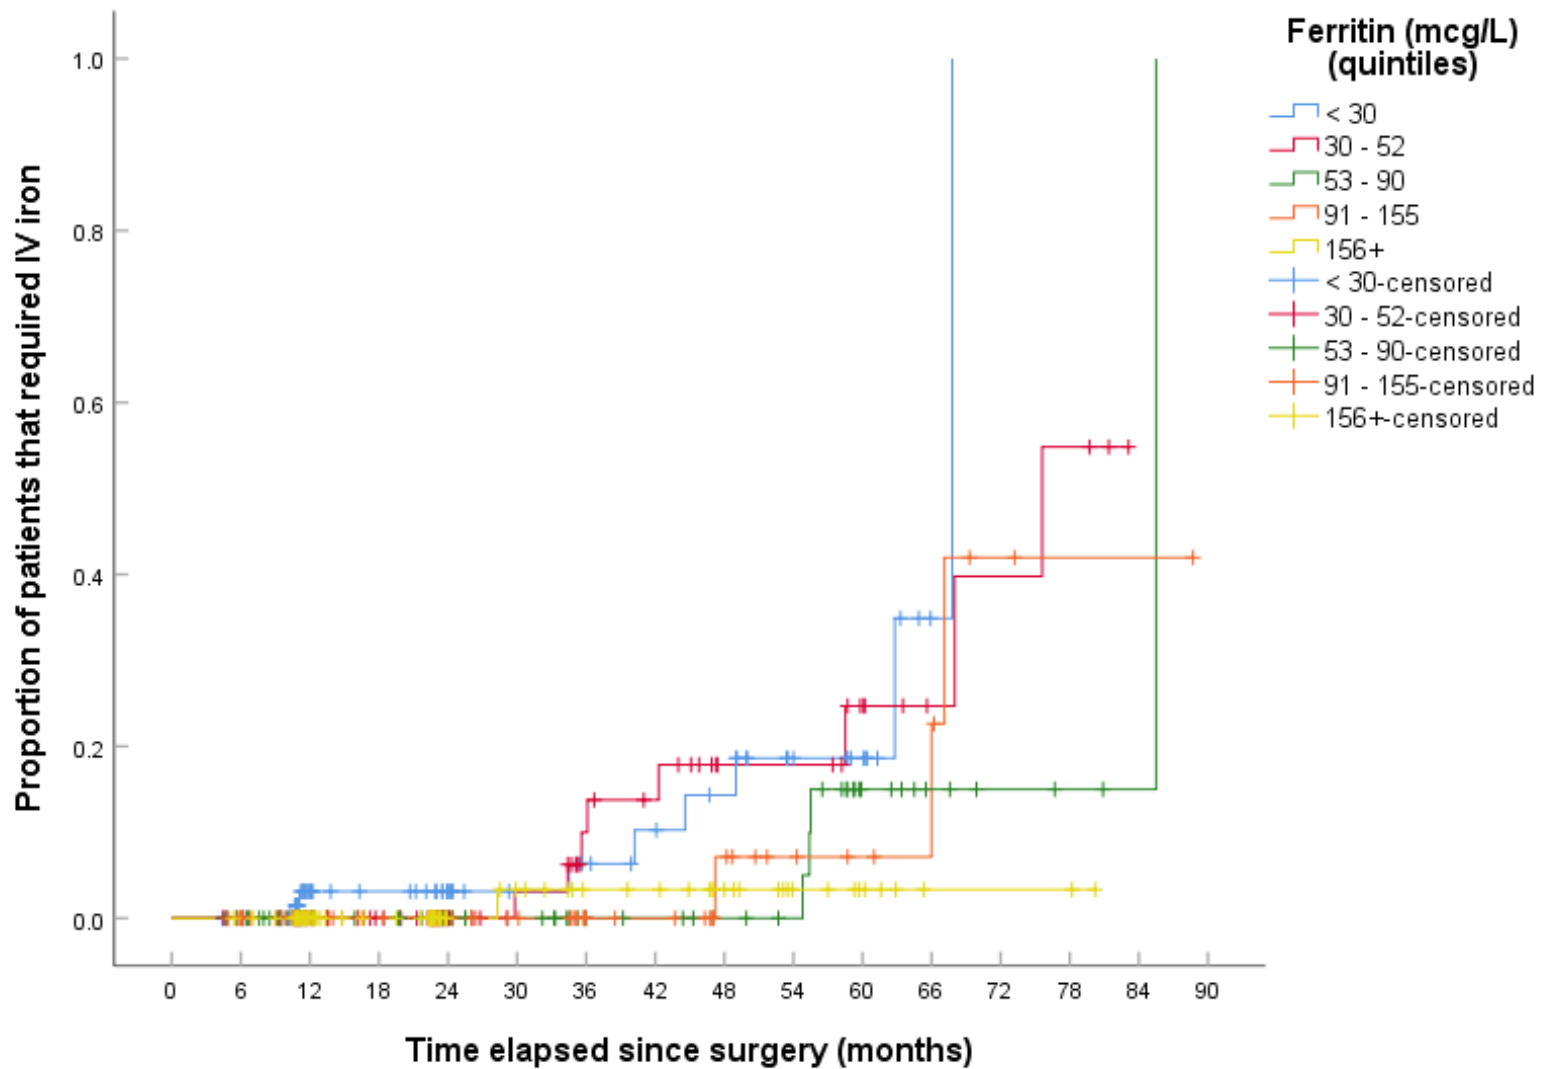

**Supplemental Figure 3. Kaplan-Meier curve of the administration of IV iron, stratified by ferritin.** Proportion of patients that required IV iron for each quintile of baseline ferritin level. There was no statistical difference between groups (p-value = 0.053).

**Supplemental Table 1. Summary of clinical and laboratory data from each follow-up visit**

|                                                   | Baseline   | 3 months    | 6 months    | 1 year      | 2 years     | 3 years     | 4 years     | 5 years     | 6 years    |
|---------------------------------------------------|------------|-------------|-------------|-------------|-------------|-------------|-------------|-------------|------------|
| <b>Patients, no. (% total)</b>                    | 388 (100)  | 381 (98.2)  | 362 (93.3)  | 335 (86.3)  | 213 (54.9)  | 87 (22.4)   | 70 (18.0)   | 45 (11.6)   | 5 (1.3)    |
| <b>Month of bloodwork, mean (SD)</b>              | -          | 2.2 (0.6)   | 5.4 (1.0)   | 11.5 (1.6)  | 23.6 (1.8)  | 35.5 (2.0)  | 47.8 (2.6)  | 60.6 (2.9)  | 72.4 (3.5) |
| <b>Weight loss (%TBW), mean (SD)</b>              | -          | 18.6 (6.9)  | 25.6 (6.6)  | 31.8 (9.1)  | 33.0 (10.7) | 31.8 (12.9) | 31.6 (11.0) | 29.9 (10.5) | -          |
| <b>BMI decrease (kg/m<sup>2</sup>), mean (SD)</b> | -          | 9.3 (3.7)   | 12.8 (3.9)  | 16.0 (5.2)  | 16.5 (5.7)  | 16.1 (7.8)  | 15.9 (7.1)  | 14.5 (6.0)  | -          |
| <b>Oral iron supplement, no. (%)</b>              |            |             |             |             |             |             |             |             |            |
| <b>Iron supplement</b>                            | -          | 119 (31.3)  | 149 (41.1)  | 142 (42.5)  | 72 (33.8)   | 20 (22.9)   | 17 (24.2)   | 9 (20.0)    | 1 (20)     |
| <b>Prenatal vitamin only</b>                      | -          | 228 (59.8)  | 179 (49.4)  | 146 (43.6)  | 70 (32.9)   | 26 (29.9)   | 16 (22.9)   | 11 (24.4)   | 1 (20)     |
| <b>Other multivitamin only</b>                    | -          | 20 (5.2)    | 23 (6.4)    | 20 (6.0)    | 11 (5.2)    | 1 (1.1)     | 3 (4.3)     | 1 (2.2)     | 0 (0)      |
| <b>None</b>                                       | -          | 5 (1.3)     | 2 (0.6)     | 8 (2.4)     | 12 (5.6)    | 7 (8.0)     | 8 (11.4)    | 4 (8.9)     | 1 (20)     |
| <b>Unknown</b>                                    | -          | 6 (1.6)     | 6 (1.7)     | 15 (4.5)    | 43 (20.2)   | 33 (37.9)   | 26 (37.1)   | 20 (44.4)   | 2 (40)     |
| <b>IV iron*, no. (%)</b>                          | -          | 0 (0)       | 0 (0)       | 2 (0.6)     | 0 (0)       | 2 (2.3)     | 2 (2.9)     | 1 (2.2)     | 0 (0)      |
| <b>Laboratory results, mean (SD)</b>              |            |             |             |             |             |             |             |             |            |
| <b>Hemoglobin (g/L)</b>                           | 133 (12)   | 135 (11)    | 135 (11)    | 134 (11)    | 133 (13)    | 132 (13)    | 134 (14)    | 131 (14)    | 125 (37)   |
| <b>MCV (fL)</b>                                   | 87.7 (5.2) | 88.3 (4.9)  | 89.3 (4.9)  | 90.0 (4.8)  | 88.9 (5.8)  | 89.1 (5.3)  | 90.1 (5.2)  | 90.2 (6.5)  | 87.8 (9.1) |
| <b>Ferritin (mcg/L)</b>                           | 104 (106)  | 111 (111)   | 100 (96)    | 90 (85)     | 91 (101)    | 80 (77)     | 71 (70)     | 68 (53)     | 21 (21)    |
| <b>Iron (mcmol/L)</b>                             | 13 (5)     | 12 (4)      | 14 (6)      | 16 (6)      | 17 (7)      | 18 (6)      | 16 (4)      | -           | -          |
| <b>IBC (mcmol/L)</b>                              | 62 (8)     | 55 (8)      | 56 (8)      | 58 (9)      | 60 (15)     | 60 (11)     | 60 (8)      | -           | -          |
| <b>Transferrin saturation (%)</b>                 | 21.9 (8.5) | 22.8 (7.1)  | 26.0 (9.2)  | 30.3 (11)   | 31.6 (12.9) | 31.3 (14.4) | 28.1 (10.5) | -           | -          |
| <b>Transferrin (g/L)</b>                          | -          | 2.30 (0.58) | 2.24 (0.19) | 2.28 (0.40) | 2.46 (0.47) | 2.50 (0.48) | 2.28 (0.96) | -           | -          |
| <b>Vitamin B12 (pmol/L)</b>                       | 345 (199)  | 448 (241)   | 421 (249)   | 418 (235)   | 442 (237)   | 515 (289)   | 491 (310)   | 571 (364)   | 286 (119)  |
| <b>Iron deficiency status, no. (%)</b>            |            |             |             |             |             |             |             |             |            |
| <b>Anemia</b>                                     | 47 (12.1)  | 34 (8.9)    | 27 (7.5)    | 32 (9.6)    | 27 (12.7)   | 12 (13.8)   | 10 (14.3)   | 7 (15.6)    | 2 (40)     |
| <b>Iron deficiency</b>                            | 72 (18.6)  | 61 (16)     | 63 (17.4)   | 78 (23.3)   | 51 (23.9)   | 30 (34.5)   | 19 (27.1)   | 11 (24.4)   | 3 (60)     |
| <b>Iron deficiency anemia</b>                     | 22 (5.7)   | 9 (2.4)     | 10 (2.8)    | 17 (5.1)    | 12 (5.6)    | 8 (9.2)     | 6 (8.6)     | 2 (4.4)     | 1 (20)     |

\*IV iron administered in period preceding follow-up appointment

BMI, body mass index; IV, intravenous; SD, standard deviation; TBW, total body weight

**Supplemental Table 2. Clinical and laboratory characteristics of patients who received IV iron.**

| Variable                                                 | Statistic    |
|----------------------------------------------------------|--------------|
|                                                          | N=24         |
| Age at time of surgery (yrs): mean (SD)                  | 41 (10)      |
| Sex/menopausal status: no. (%)                           |              |
| Male                                                     | 1 (4)        |
| Pre-menopausal female                                    | 19 (79)      |
| Post-menopausal female                                   | 4 (17)       |
| Baseline body mass index (kg/m <sup>2</sup> ): mean (SD) | 49 (7)       |
| Procedure type: no. (%)                                  |              |
| Roux-en-Y gastric bypass                                 | 17 (71)      |
| Sleeve gastrectomy                                       | 5 (21)       |
| Duodenal switch                                          | 2 (8)        |
| Hemoglobin (g/L): mean (SD)                              |              |
| Pre-operative                                            | 130 (10)     |
| Prior to IV iron                                         | 100 (21)     |
| After first course of IV iron                            | 120 (16)     |
| Ferritin (mcg/L): median (IQR)                           |              |
| Pre-operative                                            | 45 (28-72)   |
| Prior to IV iron                                         | 8 (5-10)     |
| After first course of IV iron                            | 112 (50-172) |
| Iron deficiency status prior to IV iron: n (%)           |              |
| Anemia only                                              | 2* (8)       |
| Iron deficiency only                                     | 4 (17)       |
| Iron deficiency anemia                                   | 18 (75)      |
| Oral iron, last documented prior to IV iron, no. (%)     |              |
| Ferrous gluconate                                        | 2 (8)        |

|                                                                                     |                    |
|-------------------------------------------------------------------------------------|--------------------|
| Ferrous sulfate                                                                     | 2 (8)              |
| Ferrous fumarate                                                                    | 2 (8)              |
| Polysaccharide-iron complex                                                         | 9 (38)             |
| Heme iron                                                                           | 1 (4)              |
| Prenatal vitamin only                                                               | 6 (25)             |
| None                                                                                | 1 (4)              |
| Unknown                                                                             | 1 (4)              |
| Number of courses of IV iron, no. (%)                                               |                    |
| 1                                                                                   | 15 (62)            |
| 2                                                                                   | 4 (17)             |
| 3                                                                                   | 4 (17)             |
| 4                                                                                   | 1 (4)              |
| Months between 1 <sup>st</sup> and 2 <sup>nd</sup> courses of IV iron, median (IQR) | 13 (6-27)          |
| Type of intravenous iron, no. (%)                                                   |                    |
| Iron sucrose                                                                        | 18 (75)            |
| Combination of iron sucrose and ferric gluconate                                    | 1 (4)              |
| Unknown                                                                             | 5 (21)             |
| Number of IV iron treatments (1 <sup>st</sup> course), median (IQR)                 | 6 (4-10)           |
| Iron sucrose dose (1 <sup>st</sup> course) (mg), mean (SD)                          | 214 (52)           |
| Suspected cause of iron deficiency, no. (%)                                         |                    |
| Rectal bleeding                                                                     | 1 <sup>†</sup> (4) |
| Occult gastrointestinal bleed                                                       | 1 <sup>‡</sup> (4) |
| Menstrual bleeding                                                                  | 6 (25)             |

\*Includes 1 male patient receiving darbepoetin alfa and iron sucrose with hemodialysis, and 1 pregnant patient who met criteria for iron deficiency on bloodwork taken 2 weeks prior

<sup>†</sup>Tubular adenoma and hyperplastic polyp on colonoscopy

<sup>‡</sup>Gastric antral vascular ectasia treated with argon plasma coagulation

IQR, interquartile range; IV, intravenous; SD, standard deviation

**Supplemental Table 3. Cox regression of iron deficiency (ferritin < 40 ng/mL), iron deficiency anemia, and administration of IV iron, using both univariate and multivariate analyses**

| Risk factor                       | Univariate analysis |           |         | Multivariate analysis |           |         | Multivariate excluding mediators§ |           |        |
|-----------------------------------|---------------------|-----------|---------|-----------------------|-----------|---------|-----------------------------------|-----------|--------|
|                                   | HR                  | 95% CI    | p       | HR                    | 95% CI    | p       | HR                                | 95% CI    | p      |
| <b>Iron Deficiency</b>            |                     |           |         |                       |           |         |                                   |           |        |
| Age (years)                       | 0.98                | 0.96-0.99 | <0.001* | 0.99                  | 0.98-1.01 | 0.267   | 1.05#                             | 0.98-1.12 | 0.142  |
| Female sex                        | 3.28                | 1.94-5.56 | <0.001* | 1.34‡                 | 0.79-2.48 | 0.250   | 92.7                              | 3.12-2754 | 0.009* |
| Malabsorptive procedure           | 1.97                | 1.38-2.80 | <0.001* | 1.38                  | 0.94-2.03 | 0.099   | 1.68                              | 1.16-2.42 | 0.006* |
| Baseline anemia                   | 1.69                | 1.17-2.45 | 0.005*  | 0.93                  | 0.62-1.39 | 0.719   | -                                 | -         | -      |
| Baseline ferritin (mcg/L)         | 0.96†               | 0.95-0.96 | <0.001* | 0.96†                 | 0.95-0.96 | <0.001* | -                                 | -         | -      |
| Weight loss (%TBW) at 6 months    | 1.02                | 1.00-1.04 | 0.061   | 1.00                  | 0.98-1.02 | 0.709   | 1.00                              | 0.99-1.02 | 0.698  |
| Interaction of age*sex            | -                   | -         | -       | -                     | -         | -       | 0.93                              | 0.88-0.99 | 0.030* |
| <b>Iron Deficiency Anemia</b>     |                     |           |         |                       |           |         |                                   |           |        |
| Age (years)                       | 0.97                | 0.95-0.99 | 0.011*  | 0.97                  | 0.94-0.99 | 0.007*  | 0.97**                            | 0.95-1.00 | 0.014* |
| Female sex                        | 1.79                | 0.82-3.89 | 0.144   | 1.08‡                 | 0.45-2.61 | 0.858   | 1.58‡                             | 0.71-3.51 | 0.261  |
| Malabsorptive procedure           | 1.05                | 0.63-1.75 | 0.854   | 0.95                  | 0.53-1.71 | 0.857   | 1.04                              | 0.60-1.81 | 0.875  |
| Baseline anemia                   | 22.4†               | 11.1-45.1 | <0.001* | 20.1†                 | 9.20-43.8 | <0.001* | -                                 | -         | -      |
| Baseline ferritin (mcg/L)         | 0.97†               | 0.96-0.98 | <0.001* | 0.97†                 | 0.96-0.98 | <0.001* | -                                 | -         | -      |
| Weight loss (%TBW) at 6 months    | 0.98                | 0.96-1.02 | 0.319   | 0.98                  | 0.95-1.02 | 0.257   | 0.98                              | 0.95-1.01 | 0.166  |
| <b>Administration of IV Iron¶</b> |                     |           |         |                       |           |         |                                   |           |        |
| Age (years)                       | 0.98                | 0.94-1.01 | 0.203   | -                     | -         | -       | 0.98                              | 0.94-1.02 | 0.262  |
| Female sex                        | 2.45                | 0.33-18.3 | 0.382   | -                     | -         | -       | 2.12‡                             | 0.28-16.1 | 0.469  |
| Malabsorptive procedure           | 1.62                | 0.60-4.36 | 0.342   | -                     | -         | -       | -                                 | -         | -      |
| Baseline anemia                   | 1.39                | 0.47-4.14 | 0.550   | 1.21                  | 0.40-3.63 | 0.736   | -                                 | -         | -      |
| Baseline ferritin (mcg/L)         | 0.99                | 0.98-1.00 | 0.071   | 0.99                  | 0.98-1.00 | 0.080   | -                                 | -         | -      |
| Weight loss (%TBW) at 6 months    | 0.98                | 0.92-1.04 | 0.450   | -                     | -         | -       | -                                 | -         | -      |

\* $p < 0.05$ , statistically significant

†Time-dependent covariates were used because proportional hazards assumption was not satisfied in univariate analysis. Time measured in months.

‡There was no significant interaction between age and sex using  $p < 0.05$ .

§This multivariate analysis excludes baseline anemia and baseline ferritin.

¶The multivariate analysis included only two covariates to prevent overfit.

#Young age is a statistically significant predictor of iron deficiency when the interaction term between age and sex is not included.

\*\*The effect of age is not statistical significance with the inclusion of an interaction term for age and sex.

CI, confidence interval; HR, hazard ratio; IV, intravenous; TBW, total body weight
